# Supplementary material
Source: publisher site journal article supplement (https://www.spandidos-publications.com/4716/downloadSupplementary)

Figure S1. Plasmid maps. (A) Map of pBJ1-ITGA11 plasmid. The map of the pBJ1-ITGA11 plasmid was generously provided by Dr Ning Lu (University of Bergen, Norway). (B) Map of pBJ $\Delta$  plasmid. The pBJ $\Delta$  plasmid was constructed from the pBJ1-ITGA11 plasmid as follows: pBJ1-ITGA11 plasmid was digested with *Eco*32 I (*Eco*R V) and *Pdi* I (*Nae* I) indicated by red underlines in the pBJ1-ITGA11 plasmid in (A), and an obtained 3,190 bp fragment, which encodes an empty vector generated by complete removal of the ITGA11 cDNA region was ligated, and then it was transformed into *E. coli*, yielding the pBJ $\Delta$  plasmid. ITGA11, integrin  $\alpha$ 11.

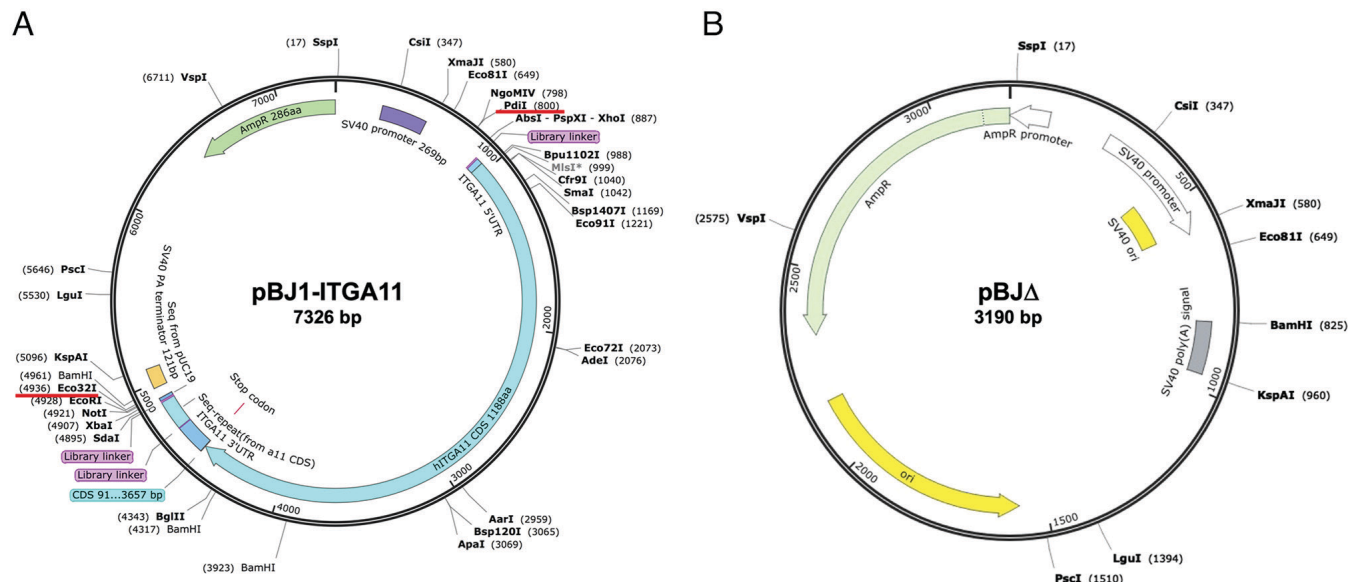

SDS-PAGE gel showing protein expression. Lanes are labeled M1, M2, 1, 2, and 3. Molecular weight markers (kDa) are indicated on the left: 111.0, 85.9, 46.7, 36.2, and 27.2. Lane 3 shows a prominent band at approximately 111 kDa (indicated by a blue arrow) and a band at approximately 86 kDa (indicated by a red arrow). Asterisks on the right indicate non-specific bands.

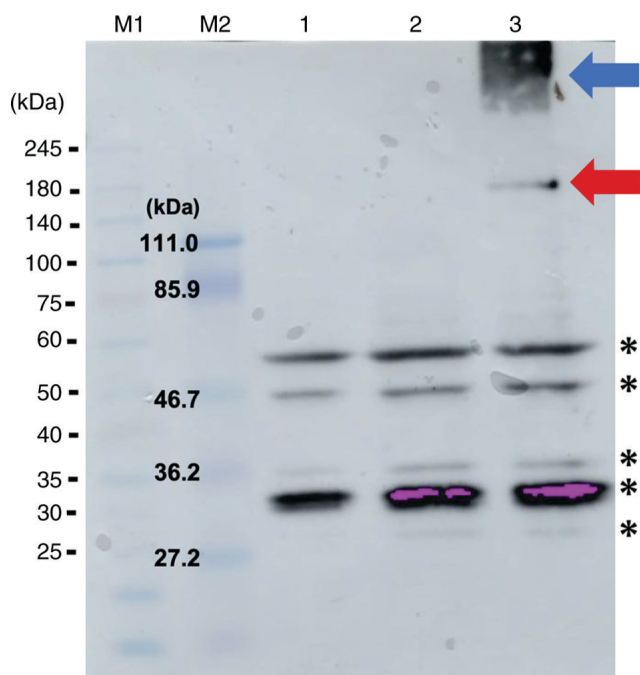

Supplement: Supplementary file 1 [file downloadSupplementary]
